# Supplementary material for: Irisin: Still chasing shadows
Source: PubMed Central journal article supplement (PMC7033458; doi:10.1016/j.molmet.2020.01.016), 2020-01-31
Supplement: mmc1.pdf [file mmc1.pdf]

## **Irisin – still chasing shadows**

Elke Albrecht <sup>1</sup>, Lisa Schering <sup>1</sup>, Friedrich Buck <sup>2</sup>, Konrad Vlach <sup>3\*</sup>, Hans-Christof Schober <sup>3</sup>, Christian A. Drevon <sup>4</sup>, Steffen Maak <sup>1#</sup>

<sup>1</sup> Institute of Muscle Biology and Growth, Leibniz Institute for Farm Animal Biology (FBN)  
Dummerstorf, Germany

<sup>2</sup> Institute of Clinical Chemistry, University Medical Center Hamburg-Eppendorf, Hamburg, Germany

<sup>3</sup> Department of Internal Medicine I, Municipal Hospital Suedstadt Rostock, Rostock, Germany

<sup>4</sup> Department of Nutrition, Institute of Basic Medical Sciences, University of Oslo, Oslo, Norway.

\* Present address: Medical Clinic III, Angiology, University Hospital Dresden, Germany

# Corresponding author: Leibniz Institute for Farm Animal Biology (FBN), Institute of Muscle Biology and Growth, Wilhelm-Stahl-Allee 2, 18196 Dummerstorf, Germany, Phone: +49 38208 68850, E-mail: [maak@fbn-dummerstorf.de](mailto:maak@fbn-dummerstorf.de)

**Supplementary Table S 1.** Characterization of human serum samples analyzed in this study.

| Subject/<br>Samples | Use              | Exercise*<br>(Sampling time after exercise)  | Irisin level (ELISA)** |                     |
|---------------------|------------------|----------------------------------------------|------------------------|---------------------|
|                     |                  |                                              | Phoenix<br>(ng/mL)     | Adipogen<br>(µg/mL) |
| HS 1                | Fig. 3           | acute exercise (120 min)                     | 125.9                  | 2.44                |
| HS 2a               | Fig. 4           | acute exercise (120 min)                     | 168.0                  | 3.91                |
| HS 2b               | Tab. 2           | combined training (0 min)                    | 102.6                  | 4.18                |
| HS 3                | Fig. 4           | acute exercise (120 min)                     | 163.6                  | 2.55                |
| HS 4a               | Tab. 2           | No exercise (baseline)                       | 124.0                  | 2.30                |
| HS 4b               | Fig. 5A          | combined training (0 min)                    | 114.5                  | 1.96                |
| HS 5a               | Tab. 2           | No exercise (baseline)                       | 109.2                  | 3.17                |
| HS 5b               | Fig. 5A, Tab. 2  | combined training (0 min)                    | 130.3                  | 2.97                |
| HS 6a               | Fig. 5C          | combined training + acute exercise (120 min) | 99.9                   | 3.18                |
| HS 6b               | Fig. 6           | combined training (0 min)                    | 105.3                  | 3.16                |
| HS 7a               | Fig. 5C          | combined training + acute exercise (120 min) | 182.7                  | 2.77                |
| HS 7b               | Fig. 6, Tab. 2   | combined training + acute exercise (0 min)   | 236.8                  | 2.96                |
| HS 7c               | Fig. S 3, Tab. 2 | combined training (0 min)                    | 188.9                  | 2.96                |

\* Acute exercise: A 45-min bicycle test at 70 % of VO<sub>2</sub>max was performed.

Combined training: Combined strength and endurance training for 12 weeks, including two endurance bicycle sessions (60 min) and two whole body strength training sessions (60 min) per week (Norheim et al. [5]).

\*\* Irisin ELISAs: Phoenix (Cat.-#: EK-067-52; Phoenix Pharmaceuticals, Burlingame, USA; Norheim et al. [5])

Adipogen (Cat.-#: AG-45A-0046Y; Adipogen Life Sciences, Liestal, Switzerland; Albrecht et al. [6])

**Supplementary Table S 2.** Primers for cDNA-PCR used in this study.

| Primer                         | T <sub>a</sub> [°C] | Amplicon length (bp) | Sequence 5'-3'                                               | GenBank Accession no.          |
|--------------------------------|---------------------|----------------------|--------------------------------------------------------------|--------------------------------|
| HS_FNDC5_1_F<br>HS_FNDC5_1_R   | 57                  | 670                  | GTC GAG GTC CCA GCT GAG<br>CTG TCG CCA TGC CAG TCC           | NM_001171941.2                 |
| HS_FNDC5_2_F<br>HS_FNDC5_2_R   | 57                  | 671                  | GAG CCA CCA TAC ACC CCG<br>TGA GGG CAA GCA CTG AAA AG        | NM_153756.2                    |
| HS_FNDC5_3_F<br>HS_FNDC5_3_R   | 57                  | 557                  | GAG CCA CCA TAC ACC CCG<br>GCA GTC ACG CTT CAA TGA TGT CA    | NM_001171940.1                 |
| HS_FNDC5_4_F<br>HS_FNDC5_3_R   | 60                  | 250                  | TAC ATA GTC CAC GTG CAG GC<br>GCA GTC ACG CTT CAA TGA TGT CA | NM_001171940.1                 |
| HS_FNDC5_5_F*<br>HS_FNDC5_4_R* | 60                  | 292                  | CCT CCA AGA ACA AAG ATG AGG<br>TAC CAG AGC ATG AGG CAC AG    | NM_001171941.2                 |
| HS_FNDC5_5_F*<br>HS_FNDC5_5_R* | 60                  | 247                  | CCT CCA AGA ACA AAG ATG AGG<br>TTT CAT ATC TTG CTG CGG AGA   | NM_153756.2                    |
| HS_FNDC5_5_F*<br>HS_FNDC5_6_R* | 60                  | 160                  | CCT CCA AGA ACA AAG ATG AGG<br>ACA GGC AGT CAC GCT TCA AT    | NM_001171940.1                 |
| HS_FNDC5_6_F<br>HS_FNDC5_7_R   | 57/60               | 160                  | AGA AAA GAG AGA GAG AGG TGC T<br>CTC CAG AAC ATC CCA GCT CA  | NM_001171941.2                 |
| HS_FNDC5_7_F<br>HS_FNDC5_8_R   | 57/60               | 218                  | GGC TCT TCT CCC AAA CGG<br>GGT CTT CCT CTC CAT CCC C         | NM_001171941.2                 |
| HS_FNDC5_8_F<br>HS_FNDC5_9_R   | 57/60               | 177                  | CCC GGC CAA TTC TAG AGT CT<br>GCA CAT CCT TCT TCT GCT GG     | NM_153756.2;<br>NM_001171940.1 |
| HS_FNDC5_9_F<br>HS_FNDC5_10_R  | 57/60               | 239                  | TCC ACC TTG TTT CTC TGG CT<br>GGG GTG TAT GGT GGC TCC        | NM_001171941.2                 |
| HS_FNDC5_7_F<br>HS_FNDC5_9_R   | 57                  | 177                  | GGC TCT TCT CCC AAA CGG<br>GCA CAT CCT TCT TCT GCT GG        | NM_001171941.2                 |
| HS_FNDC5_6_F<br>HS_FNDC5_11_R  | 57                  | 306                  | AGA AAA GAG AGA GAG AGG TGC T<br>GCC TGC ACG TGG ACT ATG TA  | NM_001171941.2                 |
| HS_FNDC5_8_F<br>HS_FNDC5_12_R  | 57                  | 206                  | CCC GGC CAA TTC TAG AGT CT<br>GGC CGC AAA GTC ATA CTC TG     | NM_153756.2                    |
| HS_FNDC5_10_F<br>HS_FNDC5_12_R | 57                  | 395                  | TTT CGG ATA GTC GTG GGA GG<br>GGC CGC AAA GTC ATA CTC TG     | NM_001171941.2                 |
| HS_FNDC5_11_F<br>HS_FNDC5_13_R | 57                  | 366                  | GCT TTG GGA GTC AGA TCA GC<br>ATC CTC CAG AAC ATC CCA GC     | NM_001171941.2                 |
| HS_FNDC5_12_F<br>HS_FNDC5_14_R | 57                  | 364                  | TGT TCA AAT CCT GGC TCT GC<br>GGC AAA TCC GAT GAC AAC CT     | NM_001171941.2                 |
| MM_Fndc5_1a_F<br>MM_Fndc5_1a_R | 53                  | 250                  | GAG CCG ATA TGC AGG C<br>CTG ACC ACG GCA GAG TTG             | XM_006503212.3                 |
| MM_Fndc5_1b_F<br>MM_Fndc5_1b_R | 57                  | 189                  | GTG GCT AGG CTG CGT CTG<br>TCC TGA ATG AAC CGG AGC AT        | NM_027402.4                    |
| MM_Fndc5_2_F<br>MM_Fndc5_2_R   | 57                  | 245                  | TGC CAT CTC TCA GCA GAA GA<br>TCC TCC CCA TCT CCT TCA TG     | NM_027402.4                    |
| MM_Fndc5_3_F<br>MM_Fndc5_3_R   | 57                  | 304                  | TGA AGG AGA TGG GGA GGA AC<br>GCA TGT TGG ACA ATC ACC GT     | NM_027402.4                    |

HS: Homo sapiens; MM: Mus musculus

\* Primer pairs from Kim et al. [30]

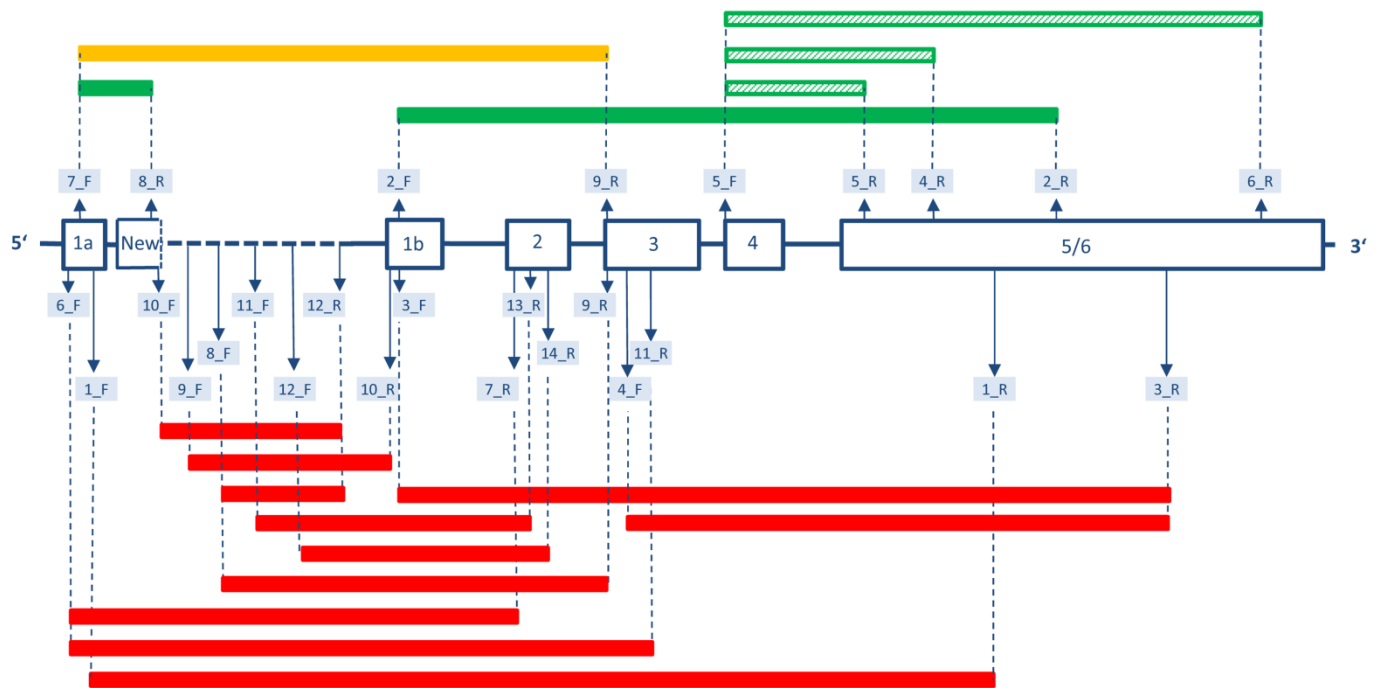

**Supplementary Figure S 1.** Primer combinations for *FNDC5* transcript analysis in human muscle.

The boxes refer to exons in the human *FNDC5* locus (compare Figure 1). The dashed line indicates a region annotated as intron but suspected to be expressed. Tested primer pairs are marked by arrows and the numbering relates to Supplementary Table S 2. Green bars: Successfully amplified and sequenced. Hatched green bars denote amplicons based on the primers published by Kim et al. [29]. Yellow bar: PCR product observed but no sequence derived. Red bars: Amplification failed.

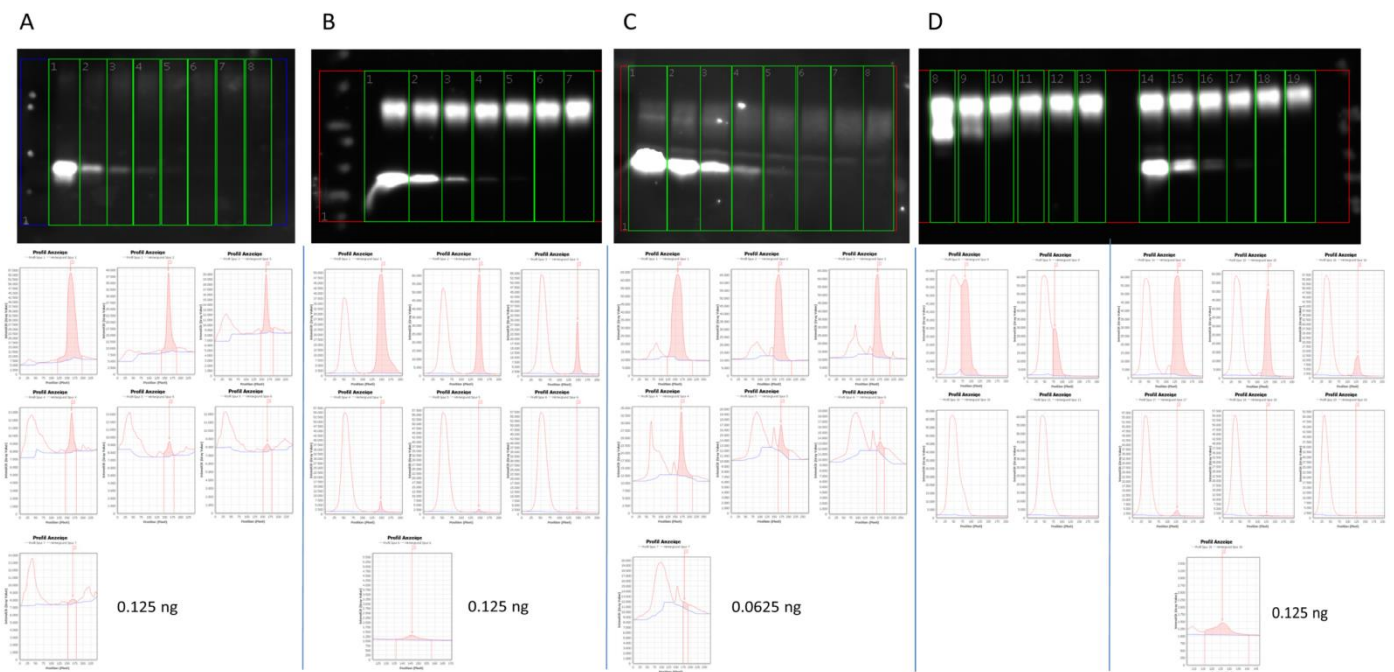

**Supplementary Figure S 2.** Image analysis of dilution series of recombinant irisin species on western blots.

**A** Recombinant irisin diluted in albumin-depleted bovine plasma. Irisin amounts per lane: 20, 4, 2, 1, 0.5, 0.25, 0.125, and 0.062 ng. Detection with antibody A. **B** Irisin amounts per lane: 4, 2, 1, 0.5, 0.25, 0.125, and 0.062 ng. Detection with antibody B. **C** Irisin amounts per lane: 4, 2, 1, 0.5, 0.25, 0.125, 0.062, and 0.031 ng. Detection with antibody C. **D** Glycosylated irisin amounts per lane: 2, 1, 0.5, 0.25, 0.125, and 0.062 ng (left panel). Same irisin amounts after deglycosylation with Protein Deglycosylation Mix II (NEB; right panel).

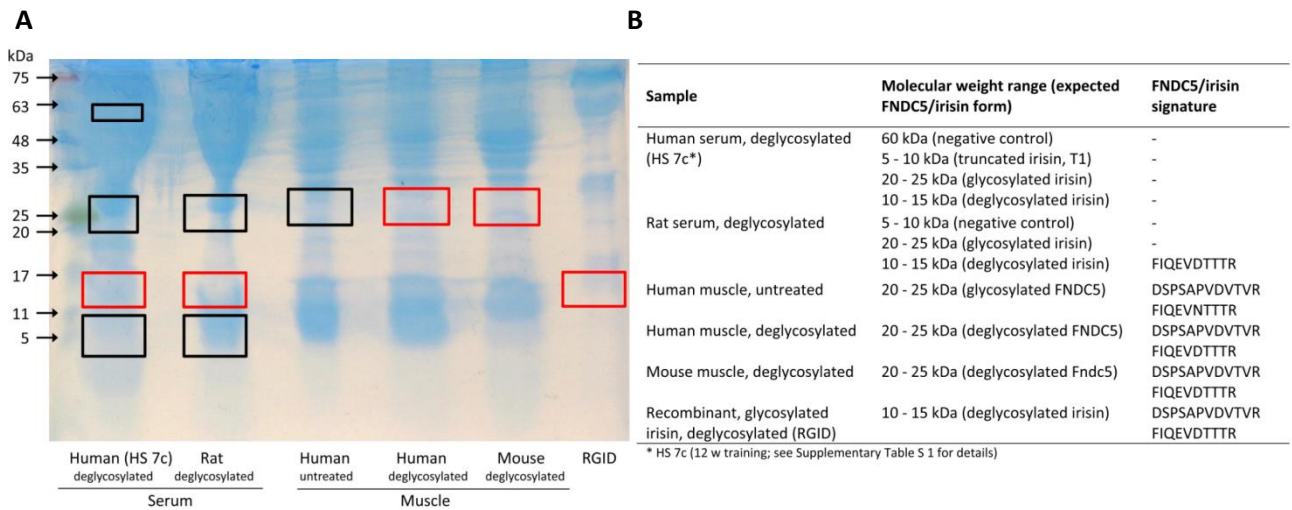

**Supplementary Figure S 3.** Detection of FNDC5/irisin by targeted mass spectrometry (DDA mode).

**A** Coomassie-stained gel with boxed regions of interest cut-out for targeted mass spectrometry in data dependent acquisition (DDA) mode. Red boxes sign areas where FNDC5/irisin was expected.

**B** Results of mass spectrometry with the detected peptides given in the last column.

## Predicted Fragmentation Pattern

| #1 | b <sup>+</sup> | b <sup>2+</sup> | Seq. | y <sup>+</sup> | y <sup>2+</sup> | #2 |
|----|----------------|-----------------|------|----------------|-----------------|----|
| 1  | 148.07569      | 74.54148        | F    |                |                 | 10 |
| 2  | 261.15975      | 131.08352       | I    | 1062.54258     | 531.77493       | 9  |
| 3  | 389.21833      | 195.11280       | Q    | 949.45851      | 475.23290       | 8  |
| 4  | 518.26092      | 259.63410       | E    | 821.39994      | 411.20361       | 7  |
| 5  | 617.32934      | 309.16831       | V    | 692.35734      | 346.68231       | 6  |
| 6  | 732.35628      | 366.68178       | D    | 593.28893      | 297.14810       | 5  |
| 7  | 833.40396      | 417.20562       | T    | 478.26199      | 239.63463       | 4  |
| 8  | 934.45164      | 467.72946       | T    | 377.21431      | 189.11079       | 3  |
| 9  | 1035.49932     | 518.25330       | T    | 276.16663      | 138.58695       | 2  |
| 10 |                |                 | R    | 175.11895      | 88.06311        | 1  |

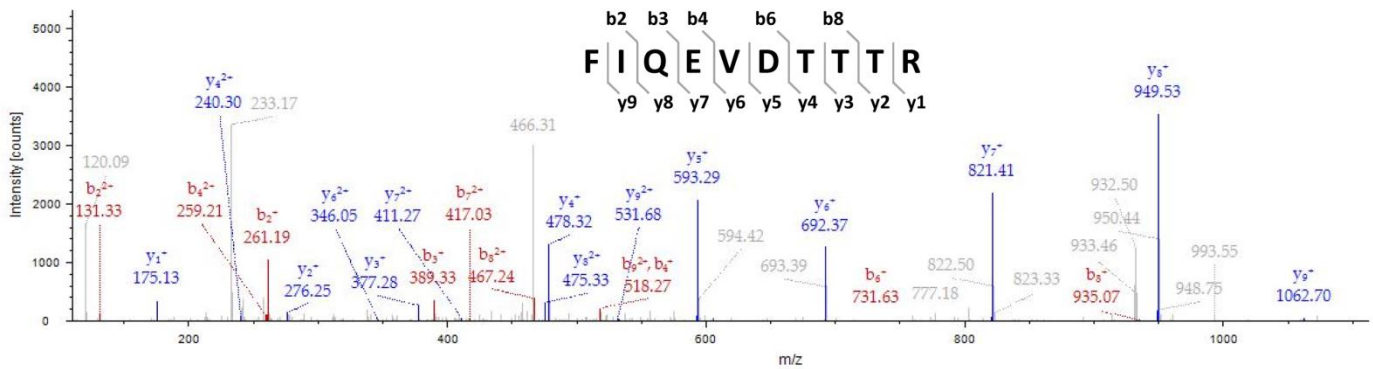

**Supplementary Figure S 4.** MS/MS spectrum of the deglycosylated, recombinant irisin peptide with b- and y-ion series m/z values.
